# Supplementary material for: Complement C5a Receptor 1 Exacerbates the Pathophysiology of N. meningitidis Sepsis and Is a Potential Target for Disease Treatment
Source: PubMed Central journal article supplement (PMC5784250; doi:10.1128/mbio.01755-17), 2018-01-23
Supplement: mbo001183685sf1.pdf [file mbo001183685sf1.pdf]

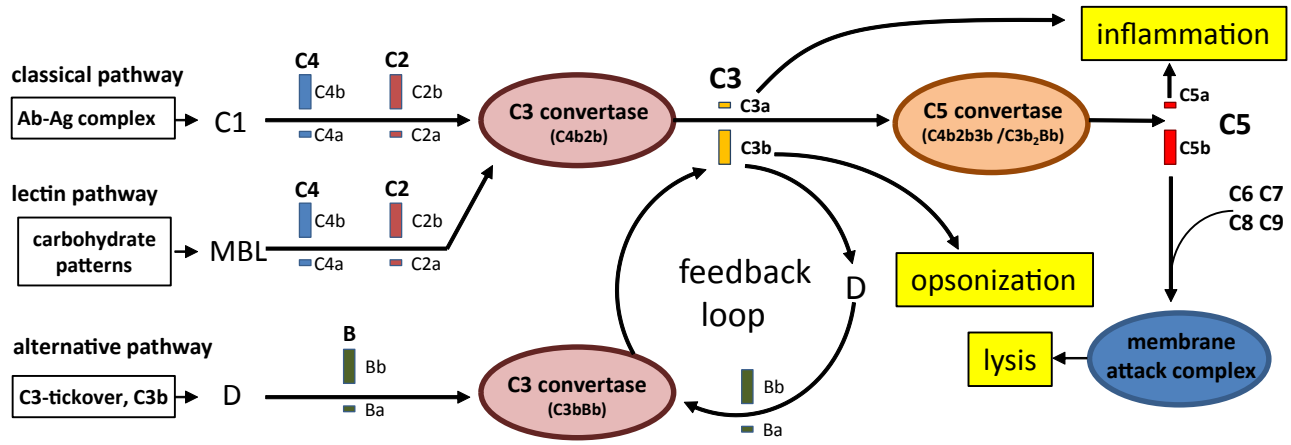

Figure S1: Schematic of the complement cascade
