# Supplementary material for: Complement C5a Receptor 1 Exacerbates the Pathophysiology of N. meningitidis Sepsis and Is a Potential Target for Disease Treatment
Source: PubMed Central journal article supplement (PMC5784250; doi:10.1128/mbio.01755-17), 2018-01-23
Supplement: mbo001183685sf2.pdf [file mbo001183685sf2.pdf]

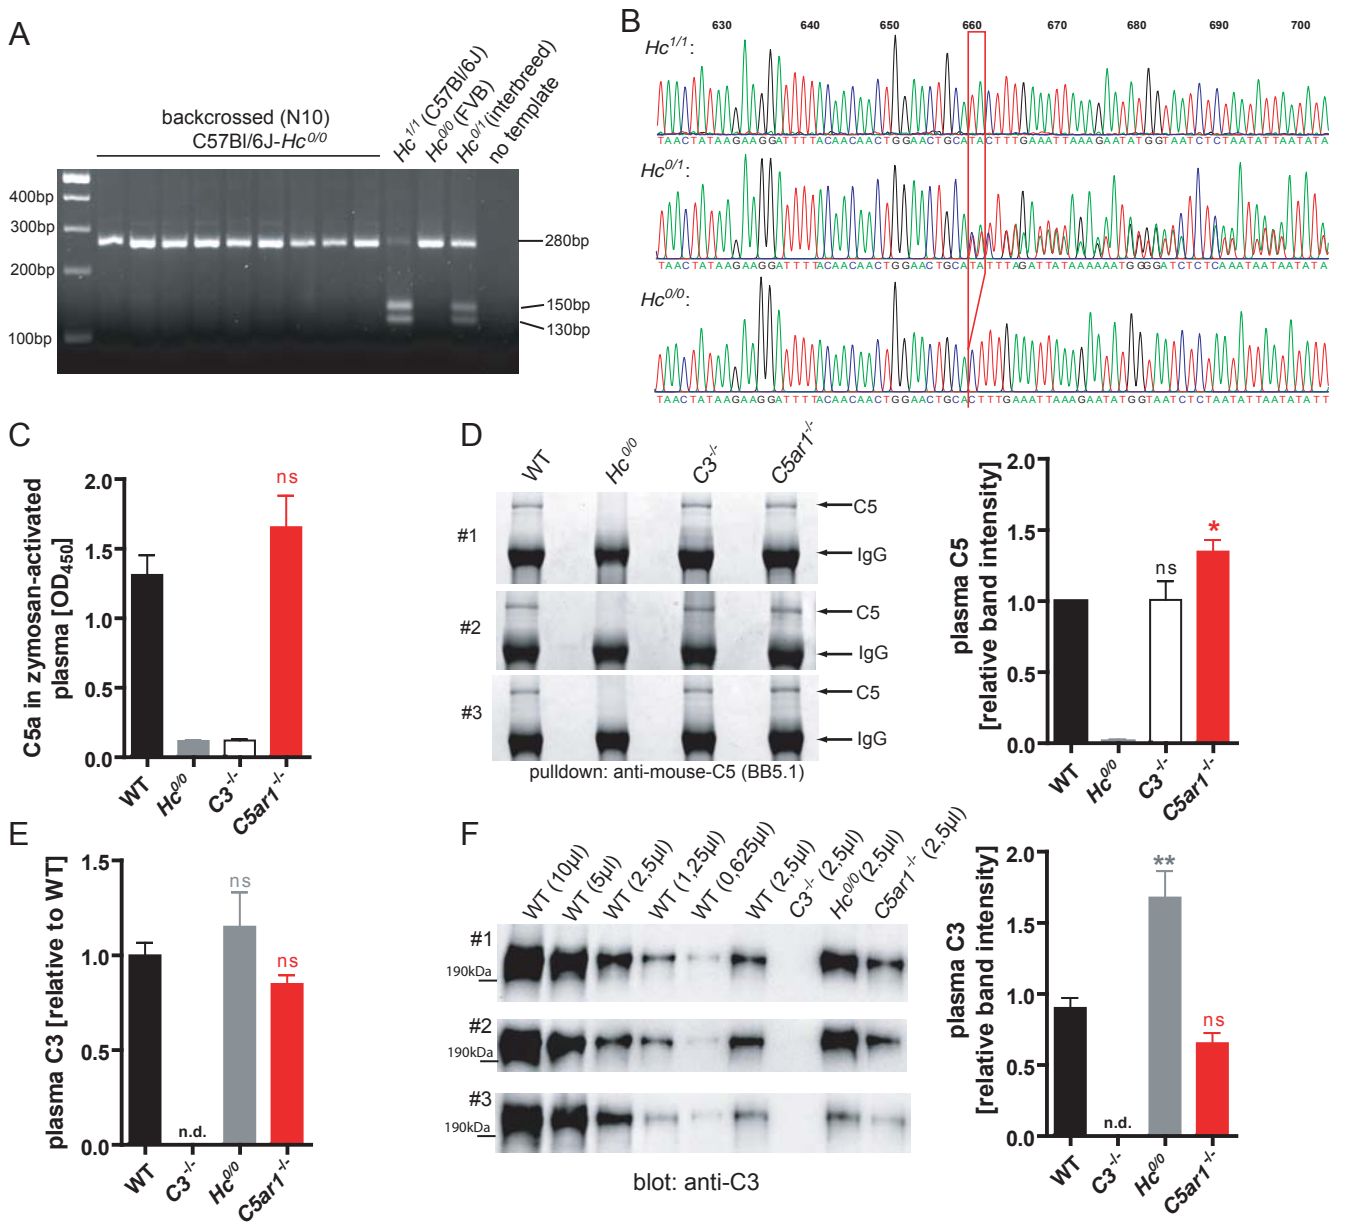

**Figure S2: Characterization of *Hc*<sup>0/0</sup> mice.** **A:** Genotyping of litters of founders of the B6.FVB-*Hc*<sup>0</sup> line (*Hc*<sup>0/0</sup>) after ten generations of backcrossing the *Hc*<sup>0</sup> allele onto C57Bl/6J background. The 280 bp amplicon of the marker associated with the wild type *Hc* gene, which encodes mouse C5, is cleaved by HindIII, whereas that associated with *Hc*<sup>0</sup> is not. **B:** Sequencing of the *Hc* gene portion containing the two-basepair gap (TA at position 660) responsible for premature termination of transcription and loss of C5 in the *Hc*<sup>0</sup> allele. Note the sequence disalignment starting at base 660 in heterozygous (*Hc*<sup>0/1</sup>) sample. **C:** Measurement of C5a in lepirudinized mouse plasma after activation with 20 mg/ml zymosan. No C5a generation is observed in either C3 or C5 deficient plasma samples whereas a similar signal is observed in WT and *C5ar1*<sup>-/-</sup> plasma samples. Data plotted are means ± SEM of samples obtained from three animals per genotype. **D:** Coomassie-stained gels after non-reducing SDS-PAGE of C5 pull-down from mouse EDTA-plasma samples using anti-mouse-C5 antibody (clone BB5.1) coupled to protein G coated magnetic beads. Three independent experiments were conducted and relative band intensities analyzed. Plotted are means ± SEM. **E:** Plasma levels of C3 in mouse strains by semi-quantitative ELISA. Plotted are means ± SEM of samples from three animals per genotype. **F:** Western blotting of EDTA-plasma samples in mouse strains and quantification by band intensities. Data are means ± SEM of three independent runs. All panels: ns, not significant; \*, *P* < 0.05 in one-way ANOVA applying Dunnett's *post hoc* test with WT as control group.
