# Supplementary material for: Complement C5a Receptor 1 Exacerbates the Pathophysiology of N. meningitidis Sepsis and Is a Potential Target for Disease Treatment
Source: PubMed Central journal article supplement (PMC5784250; doi:10.1128/mbio.01755-17), 2018-01-23
Supplement: mbo001183685sf3.pdf [file mbo001183685sf3.pdf]

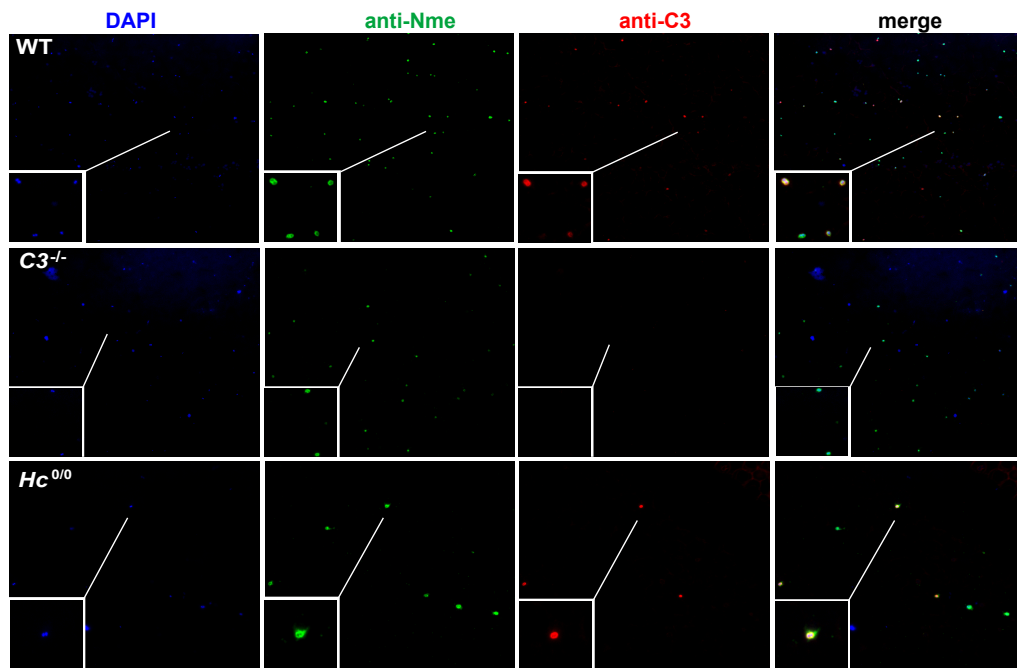

**Figure S3: Representative immunofluorescence images for graph in Fig.1B.** Bloodsmears of mice (indicated genotypes) 12 h after infection were analyzed by immunofluorescence microscopy after staining with DAPI, rabbit-anti-*Nme* (Alexa488 channel) and anti-C3 (Cy3 channel) at 60x magnification.
