# Supplementary material for: Complement C5a Receptor 1 Exacerbates the Pathophysiology of N. meningitidis Sepsis and Is a Potential Target for Disease Treatment
Source: PubMed Central journal article supplement (PMC5784250; doi:10.1128/mbio.01755-17), 2018-01-23
Supplement: mbo001183685sf4.pdf [file mbo001183685sf4.pdf]

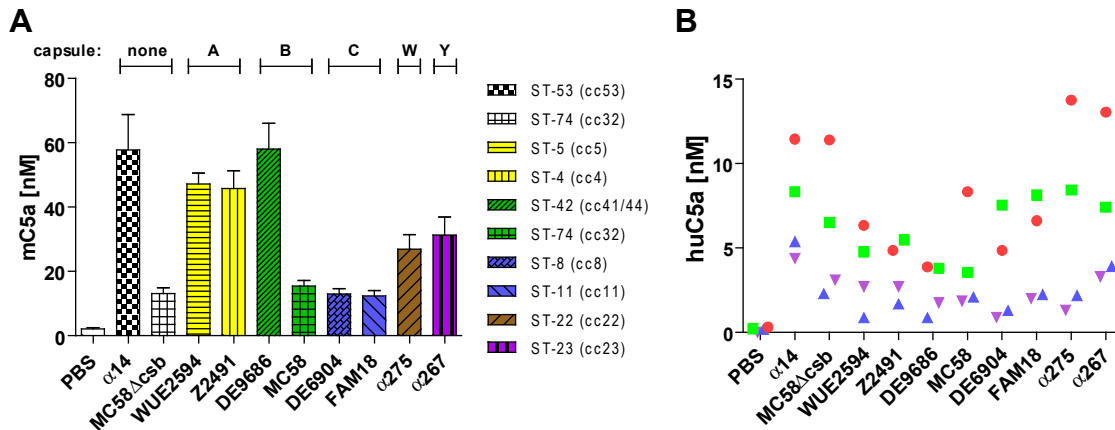

**Figure S4: C5a-liberation in whole blood models of mouse and human by different *Nme* strains.** **A:** C5a release in *ex vivo* infection of lepirudin whole mouse blood with  $10^8$ CFU/ml of various *Nme* strains covering most relevant serogroups and sequence types as indicated in legend (means + SEM; n = 3). **B:** Same as for panel A, but with human whole blood (n = 4 individual donors, indicated by individual symbols).
