# Supplementary material for: Complement C5a Receptor 1 Exacerbates the Pathophysiology of N. meningitidis Sepsis and Is a Potential Target for Disease Treatment
Source: PubMed Central journal article supplement (PMC5784250; doi:10.1128/mbio.01755-17), 2018-01-23
Supplement: mbo001183685sf5.pdf [file mbo001183685sf5.pdf]

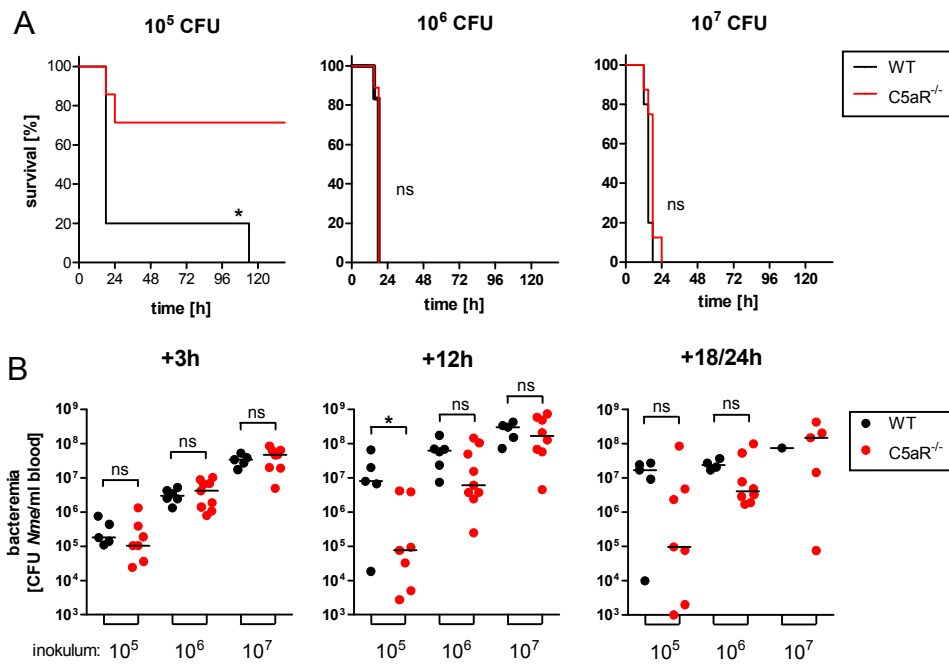

**Figure S5: Survival and bacteremia in WT versus *C5aR1*<sup>-/-</sup> mice after infection with different inocula of *Nme*.** **A:** Survival curves of WT and *C5aR1*<sup>-/-</sup> mice after intraperitoneal infection with 10<sup>5</sup>, 10<sup>6</sup> or 10<sup>7</sup> CFU of *Nme* strain MC58 as indicated above graphs. ns, not significant; \*,  $P < 0.05$  in Mantel-Cox analysis. **B:** Bacteremia in blood of the same mice as in above graph assessed at 3 h, 12 h and 18/24 h after infection. 18 h values were included in the 18/24 h data set from those mice which did not survive until 24 h. Plotted are values of individual mice, lines indicate median. ns, not significant; \*,  $P < 0.05$  in unpaired, two-tailed Mann-Whitney test comparing WT vs. *C5aR1*<sup>-/-</sup> separately for each inoculum and time point. Note that mice in the cohorts infected with 10<sup>5</sup> CFU are identical to a subset of mice in Fig. 3 A,B and are plotted here as comparison from within the same experiment.
