# Supplementary material for: Complement C5a Receptor 1 Exacerbates the Pathophysiology of N. meningitidis Sepsis and Is a Potential Target for Disease Treatment
Source: PubMed Central journal article supplement (PMC5784250; doi:10.1128/mbio.01755-17), 2018-01-23
Supplement: mbo001183685sf7.pdf [file mbo001183685sf7.pdf]

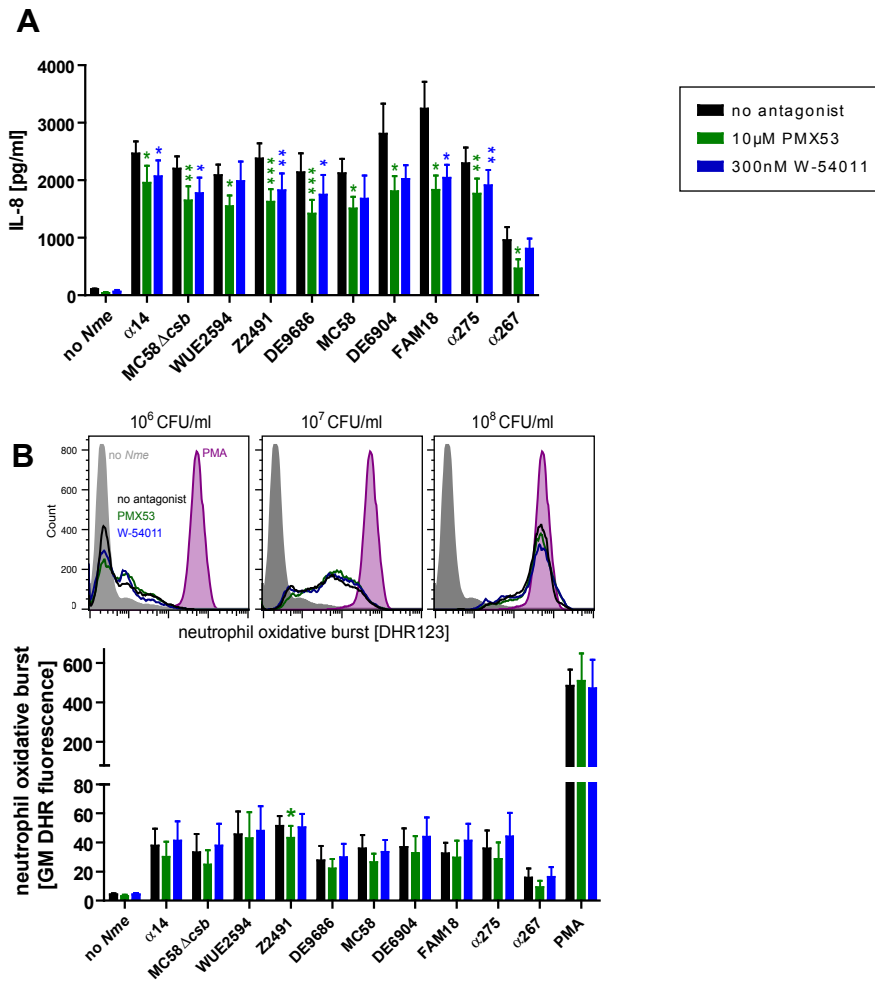

**Figure S7: IL-8 secretion and oxidative burst in human whole blood infected with various *Nme* strains.** **A:** IL-8 (mean  $\pm$  SEM) in human whole blood infection ( $n = 4$  donors) with  $10^7$  CFU/ml of *Nme* strains (indicated below x-axis) in presence of PMX53 ( $10 \mu\text{M}$ ) or W-54011 ( $300 \text{ nM}$ ) at 90 min. **B:** Neutrophil oxidative burst after 1h infection of whole human blood. Representative histograms show results for infection with  $10^6$ ,  $10^7$  or  $10^8$  CFU/ml of *Nme* MC58 in presence or absence of C5aR1 antagonists. Bar graph below shows results from infections with  $10^7$  CFU/ml of *Nme* strains (indicated below x-axis) as mean fluorescence intensity (MFI)  $\pm$  SEM ( $n = 4$ ). \*, \*\*, \*\*\*:  $P < 0,05$ ,  $0,01$  or  $0,005$ , respectively, in repeated measures ANOVA (matched observations per individual donor), applying Dunnett's *post hoc* test. If no indication is given, differences were not significant.
