# Supplementary material for: Complement C5a Receptor 1 Exacerbates the Pathophysiology of N. meningitidis Sepsis and Is a Potential Target for Disease Treatment
Source: PubMed Central journal article supplement (PMC5784250; doi:10.1128/mbio.01755-17), 2018-01-23
Supplement: mbo001183685sf8.pdf [file mbo001183685sf8.pdf]

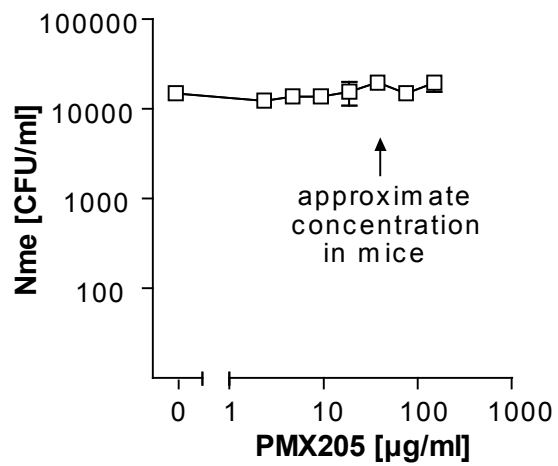

**Fig. S8: No bactericidal activity of PMX205 towards *Nme*.** *Nme* viability was assayed by incubation of *Nme* MC58 at 37°C for 1 h in mouse serum with indicated concentrations of PMX205 (mean ± SEM; n = 3) before dilution plating.
